# Supplementary material
Source: PubMed Central journal article supplement (PMC3318138)
Supplement: mmc1.pdf [file mmc1.pdf]

## Supporting Materials

### Solution Model of the Intrinsically Disordered Polyglutamine Tract-Binding Protein-1

Martin Rees,<sup>†</sup> Christian Gorba,<sup>§</sup> Cesira de Chiara,<sup>¶</sup> Tam T. T. Bui,<sup>‡</sup> Mitla Garcia-Maya,<sup>†</sup> Alex F. Drake,<sup>‡</sup> Hitoshi Okazawa,<sup>||</sup> Annalisa Pastore,<sup>¶</sup> Dmitri Svergun,<sup>§\*</sup> and Yu Wai Chen<sup>†</sup>

<sup>†</sup>Randall Division of Cell and Molecular Biophysics, and <sup>‡</sup>Biomolecular Spectroscopy Centre, King's College London, London, United Kingdom; <sup>§</sup>European Molecular Biology Laboratory, Hamburg, Germany; <sup>¶</sup>Molecular Structure Group, Medical Research Council National Institute of Medical Research, London, United Kingdom; and <sup>||</sup>Department of Neuropathology, Medical Research Institute, Tokyo Medical and Dental University, Tokyo, Japan

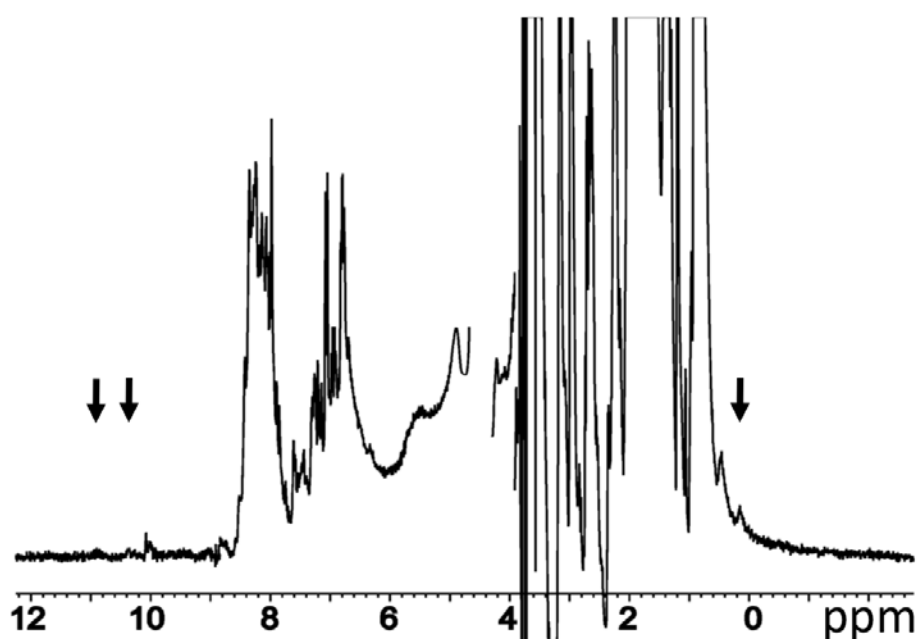

**Figure S1. 1D <sup>1</sup>H NMR spectrum of PQBP-1.** The spectrum of full-length PQBP-1 recorded on a Varian 600MHz spectrometer at 25°C. Data was acquired at a sample concentration of 0.2 to 0.5  $\mu$ M in Native buffer (20mM Tris-HCl pH7.0, 150mM NaCl, 1 mM DTT). The arrows indicate chemical shifts at 0.2, 10.4 and 10.9 ppm.

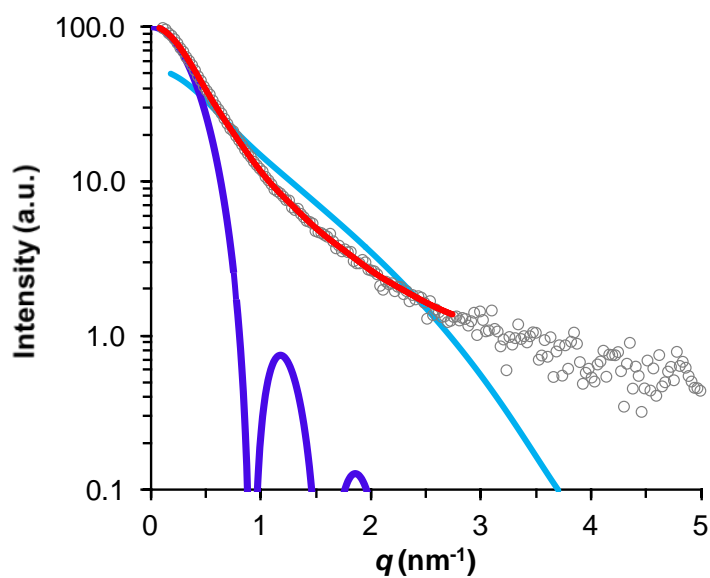

**Figure S2. Alternative shape models for SAXS analysis of PQBP-1.** The experimental X-ray scattering is shown as circles, along with the scattering calculated from the DAMMIF bead model of PQBP-1 (red, same as black curve in Figure 5b). The curve in cyan shows the scattering calculated from the best-fit ellipsoid-of-revolution model (half axes  $a=1.0$  nm and  $c=5.4$  nm). The scattering calculated from a spherical model having an  $R_g$  of 3.8 nm, the same as that of PQBP-1, is shown in blue. Intensity values smaller than 0.1 arbitrary units (a.u.) are truncated.
